# Supplementary material
Source: PubMed Central journal article supplement (PMC3512145)
Supplement: a461f89eba09db53cea38da97d0448a2_genetics.112.145706-4.pdf [file a461f89eba09db53cea38da97d0448a2_genetics.112.145706-4.pdf]

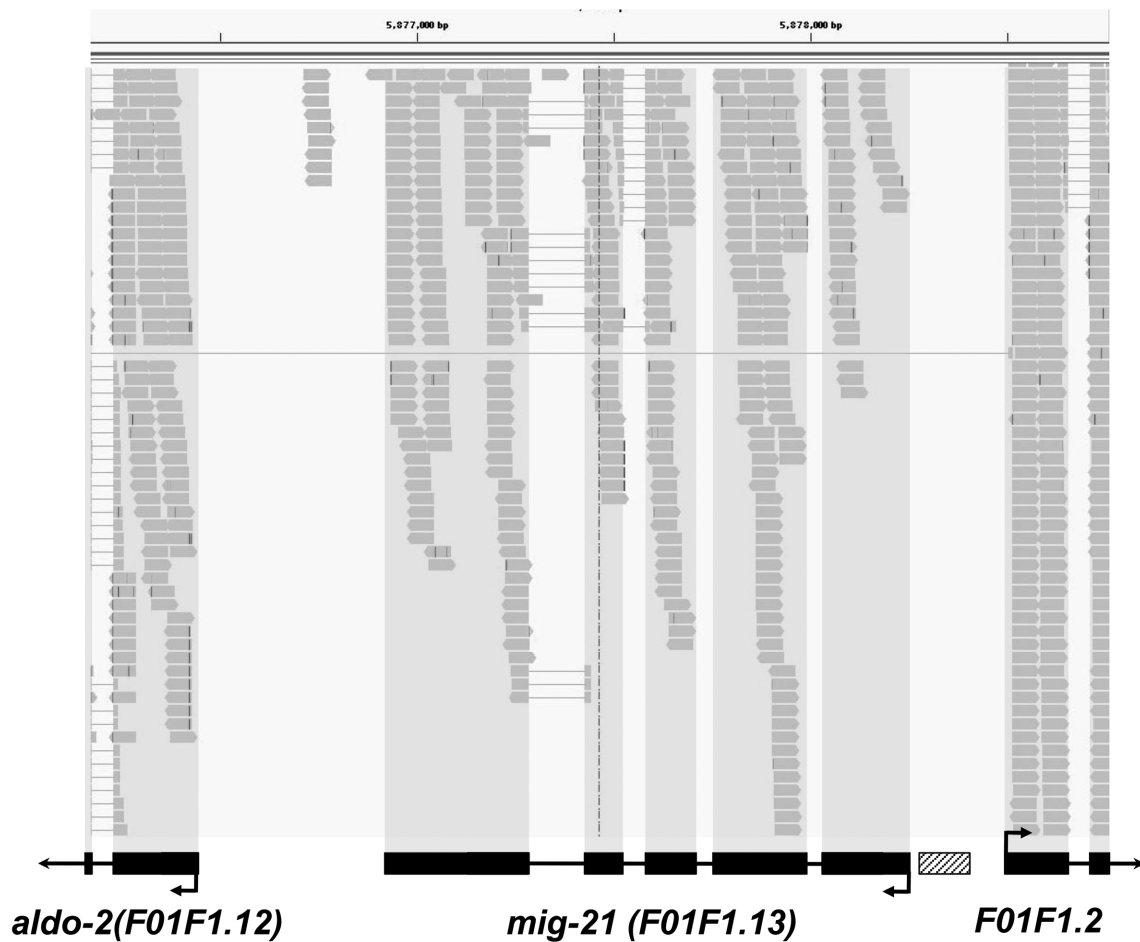

**Figure S1** The *mig-21* locus as defined by RNA seq transcript sequencing. Shown is output from the Integrated Genome Viewer 2.0.15 program which aligned RNA seq reads (grey bars) from L1 larvae at 5-5.5 h post hatching to the *C. elegans* genome. The *F01F1.13/mig-21* region is shown, as are the flanking genes *F01F1.12/aldo-1* and *F01F1.2*. Read polarity is indicated by a point at the end of each run, and thin lines between reads indicate that the read aligned across a putative intron. The hatched box represents the region of exon 1 predicted in Middelkoop et al., 2012 but that is not represented by reads in this RNA seq analysis.
