# Supplementary material
Source: PubMed Central journal article supplement (PMC3512145)
Supplement: bcfd9da6d273312dc3d142131e2f6eb7_genetics.112.145706-5.pdf [file bcfd9da6d273312dc3d142131e2f6eb7_genetics.112.145706-5.pdf]

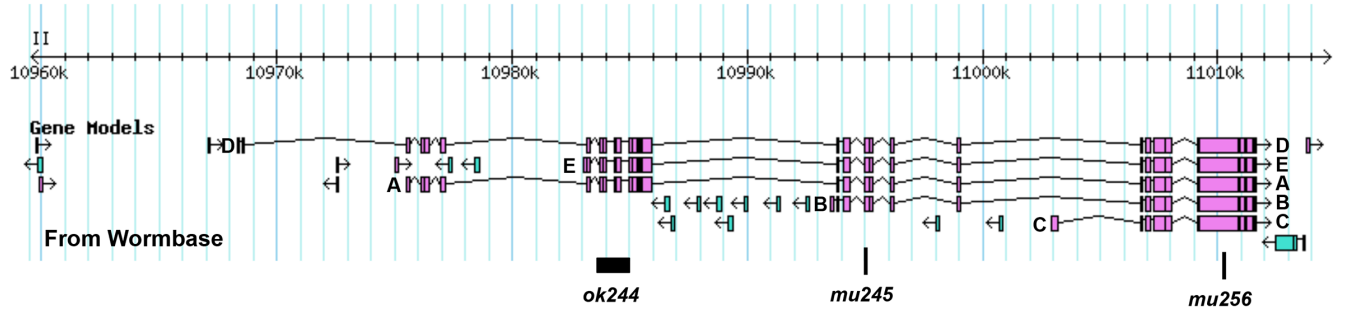

*mu245*: *ptp-3B* exon 4      **A**  
 ACAATCTATGGTTACGCGCACAAGGATATCCGGACT**C**ATATGTCAAGGCGAAGACAGTCGACGGAACCGATCTATCAAC

*mu256*: *ptp-3B* exon 12      **GA**  
 CTGCCACATATGGAGATATCGAGGTGACACTGTTG**GA**AAGCGTTCATTGGCTCATTATACGATGAGAACGATGCGATT

**Figure S3** The *ptp-3* locus and mutations. A screen shot from Wormbase 229 of the *ptp-3* locus with the A-E isoforms indicated. The sites of *ptp-3* mutations are shown, with the corresponding nucleotide changes below.
